# Supplementary material for: Semi-organic salts of aniline with inorganic acids: prospective materials for the second harmonic generation
Source: Royal Society of Chemistry journal article supplement (doi:10.1039/c1ce05170a), 2011-01-01

## Supplementary materials

### **Semi-organic salts of aniline with inorganic acids: prospective materials for the second harmonic generation**

Irena Matulková<sup>a,b</sup>, Jaroslav Cihelka<sup>a,c</sup>, Karla Fejfarová<sup>d</sup>, Michal Dušek<sup>d</sup>, Michaela Pojarová<sup>d</sup>,  
Přemysl Vaněk<sup>c</sup>, Jan Kroupa<sup>c</sup>, Michal Šála<sup>e</sup>, Radmila Krupková<sup>c</sup>, Ivan Němec<sup>b</sup>

<sup>a</sup>*J. Heyrovský Institute of Physical Chemistry ASCR, v.v.i., Dolejškova 3, 182 23 Prague 8, Czech Republic*

<sup>b</sup>*Faculty of Science, Department of Inorganic Chemistry, Charles University in Prague, Hlavova 8, 128 40 Prague 2, Czech Republic*

<sup>c</sup>*Institute of Physics ASCR, v.v.i., Na Slovance 2, 182 21 Prague 8, Czech Republic*

<sup>d</sup>*Institute of Physics ASCR, v.v.i., Cukrovarnická 10/112, 162 00 Prague 6, Czech Republic*

<sup>e</sup>*Institute of Organic Chemistry and Biochemistry ASCR, v.v.i., Flemingovo nám. 2, 166 10 Prague 6, Czech Republic*

**Table S1:** Selected bond lengths [Å] and angles [°] for **an<sub>2</sub>SO<sub>4</sub>**

| Bond/Angle | Value    | Angle       | Value    |
|------------|----------|-------------|----------|
| S1-O1      | 1.467(4) | O1-S1-O4    | 108.8(2) |
| S1-O2      | 1.452(3) | O2-S1-O3    | 109.9(2) |
| S1-O3      | 1.485(4) | O2-S1-O4    | 111.1(2) |
| S1-O4      | 1.463(2) | O3-S1-O4    | 108.7(2) |
| N1-C1      | 1.442(4) | N1-C1-C2    | 120.3(5) |
| N2-C7      | 1.451(4) | N1-C1-C6    | 119.0(5) |
| C1-C2      | 1.362(8) | C2-C1-C6    | 120.7(4) |
| C1-C6      | 1.391(8) | C1-C2-C3    | 118.6(5) |
| C2-C3      | 1.397(7) | C2-C3-C4    | 120.5(6) |
| C3-C4      | 1.37(1)  | C3-C4-C5    | 119.8(5) |
| C4-C5      | 1.35(1)  | C4-C5-C6    | 121.2(6) |
| C5-C6      | 1.365(7) | C1-C6-C5    | 119.2(5) |
| C7-C8      | 1.376(9) | N2-C7-C8    | 119.3(5) |
| C7-C12     | 1.359(8) | N2-C7-C12   | 119.2(5) |
| C8-C9      | 1.391(7) | C8-C7-C12   | 121.5(4) |
| C9-C10     | 1.38(1)  | C7-C8-C9    | 118.9(5) |
| C10-C11    | 1.37(1)  | C8-C9-C10   | 120.2(6) |
| C11-C12    | 1.389(7) | C9-C10-C11  | 119.7(5) |
| O1-S1-O2   | 110.4(2) | C10-C11-C12 | 120.7(6) |
| O1-S1-O3   | 107.9(2) | C7-C12-C11  | 119.1(6) |

  

| Hydrogen bonds           |         |           |           |        |
|--------------------------|---------|-----------|-----------|--------|
| D-H...A                  | d (D-H) | d (A...H) | d (D...A) | <(DHA) |
| N1-H1A...O1 <sup>a</sup> | 0.87    | 1.92      | 2.747(6)  | 159    |
| N1-H1B...O4 <sup>b</sup> | 0.87    | 1.85      | 2.713(4)  | 173    |
| N1-H1C...O3              | 0.87    | 1.84      | 2.696(6)  | 168    |
| N2-H2A...O1              | 0.87    | 2.09      | 2.887(5)  | 153    |
| N2-H2A...O3 <sup>c</sup> | 0.87    | 2.42      | 2.921(5)  | 117    |
| N2-H2B...O2 <sup>d</sup> | 0.87    | 2.00      | 2.794(4)  | 150    |
| N2-H2C...O3              | 0.87    | 2.60      | 2.946(5)  | 105    |
| N2-H2C...O1 <sup>e</sup> | 0.87    | 2.24      | 2.968(5)  | 141    |
| N2-H2C...O4 <sup>e</sup> | 0.87    | 2.40      | 3.152(7)  | 145    |

*Note.*

Equivalent positions: <sup>a</sup>  $x, 1+y, z$ ; <sup>b</sup>  $3/2-x, 1/2+y, -z$ ; <sup>c</sup>  $3/2-x, -1/2+y, 1-z$ ; <sup>d</sup>  $x, y, 1+z$ ; <sup>e</sup>  $3/2-x, 1/2+y, 1-z$ .

Abbreviations: A, acceptor; D, donor.

**Table S2:** Selected bond lengths [Å] and angles [°] for **an<sub>2</sub>SeO<sub>4</sub>**

| Bond/Angle | Value     | Angle       | Value     |
|------------|-----------|-------------|-----------|
| Se1-O1     | 1.640(2)  | O1-Se1-O4   | 108.7(1)  |
| Se1-O2     | 1.627(1)  | O2-Se1-O3   | 109.9(1)  |
| Se1-O3     | 1.637(2)  | O2-Se1-O4   | 112.07(7) |
| Se1-O4     | 1.637(1)  | O3-Se1-O4   | 108.7(1)  |
| N1-C1      | 1.445(2)  | N1-C1-C2    | 119.9(3)  |
| N2-C7      | 1.454(3)  | N1-C1-C6    | 118.9(3)  |
| C1-C2      | 1.384(4)  | C2-C1-C6    | 121.2(2)  |
| C1-C6      | 1.397(5)  | C1-C2-C3    | 118.8(3)  |
| C2-C3      | 1.389(4)  | C2-C3-C4    | 120.5(3)  |
| C3-C4      | 1.390(4)  | C3-C4-C5    | 119.6(2)  |
| C4-C5      | 1.375(4)  | C4-C5-C6    | 121.3(3)  |
| C5-C6      | 1.378(4)  | C1-C6-C5    | 118.6(2)  |
| C7-C8      | 1.383(5)  | N2-C7-C8    | 119.5(3)  |
| C7-C12     | 1.377(5)  | N2-C7-C12   | 119.6(3)  |
| C8-C9      | 1.383(3)  | C8-C7-C12   | 121.0(2)  |
| C9-C10     | 1.391(4)  | C7-C8-C9    | 119.5(2)  |
| C10-C11    | 1.394(5)  | C8-C9-C10   | 119.4(3)  |
| C11-C12    | 1.366(4)  | C9-C10-C11  | 120.2(2)  |
| O1-Se1-O2  | 109.0(1)  | C10-C11-C12 | 119.7(3)  |
| O1-Se1-O3  | 108.35(9) | C7-C12-C11  | 120.1(3)  |

Hydrogen bonds

| D-H...A                  | d (D-H) | d (A...H) | d (D...A) | <(DHA) |
|--------------------------|---------|-----------|-----------|--------|
| N1-H1A...O1 <sup>a</sup> | 0.87    | 1.88      | 2.723(3)  | 163    |
| N1-H1B...O4 <sup>b</sup> | 0.87    | 1.90      | 2.709(2)  | 154    |
| N1-H1C...O3              | 0.87    | 1.93      | 2.696(3)  | 146    |
| N2-H2A...O1              | 0.87    | 2.34      | 2.885(3)  | 121    |
| N2-H2A...O3 <sup>c</sup> | 0.87    | 2.24      | 2.918(3)  | 135    |
| N2-H2B...O2 <sup>d</sup> | 0.87    | 1.87      | 2.708(2)  | 160    |
| N2-H2C...O3              | 0.87    | 2.18      | 2.931(3)  | 145    |
| N2-H2C...O1 <sup>e</sup> | 0.87    | 2.37      | 2.972(3)  | 126    |

*Note.*

Equivalent positions: <sup>a</sup>  $x, 1+y, z$ ; <sup>b</sup>  $3/2-x, 1/2+y, -z$ ; <sup>c</sup>  $3/2-x, -1/2+y, 1-z$ ; <sup>d</sup>  $x, y, 1+z$ ; <sup>e</sup>  $3/2-x, 1/2+y, 1-z$ .

Abbreviations: A, acceptor; D, donor.

**Table S3:** Selected bond lengths [Å] and angles [°] for **an<sub>2</sub>SeO<sub>4</sub>·2H<sub>2</sub>O**

| Bond/Angle                | Value    | Angle                                | Value     |        |
|---------------------------|----------|--------------------------------------|-----------|--------|
| Se1-O1                    | 1.634(4) | O1-Se1-O1 <sup>a</sup>               | 109.4(2)  |        |
| Se1-O2                    | 1.633(3) | O1-Se1-O2 <sup>a</sup>               | 108.8(2)  |        |
| Se1-O1 <sup>a</sup>       | 1.634(4) | O2-Se1-O1 <sup>a</sup>               | 108.8(2)  |        |
| Se1-O2 <sup>a</sup>       | 1.633(3) | O2-Se1-O2 <sup>a</sup>               | 109.6(2)  |        |
| N1-C1                     | 1.478(7) | O1 <sup>a</sup> -Se1-O2 <sup>a</sup> | 110.2(2)  |        |
| C1-C2                     | 1.355(8) | N1-C1-C2                             | 119.1(5)  |        |
| C1-C6                     | 1.376(7) | N1-C1-C6                             | 119.0(5)  |        |
| C2-C3                     | 1.38(1)  | C1-C2-C3                             | 119.6(6)  |        |
| C3-C4                     | 1.372(9) | C1-C6-C5                             | 118.5(5)  |        |
| C4-C5                     | 1.369(9) | C2-C1-C6                             | 121.9(6)  |        |
| C5-C6                     | 1.37(1)  | C2-C3-C4                             | 119.0(6)  |        |
| O3W-H1W                   | 0.74(7)  | C3-C4-C5                             | 121.2(7)  |        |
| O3W-H2W                   | 0.90(7)  | C4-C5-C6                             | 119.8(6)  |        |
| O1-Se1-O2                 | 110.2(2) | H1W-O3W-H2W                          | 107(6)    |        |
| Hydrogen bonds            |          |                                      |           |        |
| D-H...A                   | d (D-H)  | d (A...H)                            | d (D...A) | <(DHA) |
| O3W-H1W...O1 <sup>b</sup> | 0.74(7)  | 2.14(6)                              | 2.863(6)  | 167(8) |
| O3W-H2W...O2 <sup>c</sup> | 0.90(7)  | 1.94(7)                              | 2.791(6)  | 157(5) |
| N1-H1A...O3W <sup>d</sup> | 0.87     | 1.95                                 | 2.824(6)  | 176    |
| N1-H1B...O2 <sup>d</sup>  | 0.87     | 1.91                                 | 2.758(6)  | 165    |
| N1-H1C...O1               | 0.87     | 2.01                                 | 2.818(6)  | 154    |

*Note.*

Equivalent positions: <sup>a</sup> -x, y, 1/2-z; <sup>b</sup> x, -1+y, z; <sup>c</sup> 1/2+x, -1/2+y, z; <sup>d</sup> 1/2+x, 1/2+y, z

Abbreviations: A, acceptor; D, donor.

**Table S4:** FTIR and Raman spectra of  $\text{an}_2\text{SeO}_4$

| FTIR<br>( $\text{cm}^{-1}$ ) | Raman<br>( $\text{cm}^{-1}$ ) | Assignment                           | FTIR<br>( $\text{cm}^{-1}$ ) | Raman<br>( $\text{cm}^{-1}$ ) | Assignment                                           |
|------------------------------|-------------------------------|--------------------------------------|------------------------------|-------------------------------|------------------------------------------------------|
|                              | 3454 wb                       | $\nu$ (N-H...O)                      | 1122 m                       |                               | Ph (9b), $\nu$ CN                                    |
|                              | 3413 wb                       | $\nu$ (N-H...O)                      | 1091 sh                      |                               | Ph (5), $\rho$ $\text{NH}_3^+$                       |
| 3354 mb                      |                               | $\nu$ (N-H...O)                      | 1066 vw                      | 1065 vw                       | Ph (17a)                                             |
|                              | 3200 vw                       | $\nu$ (N-H...O)                      | 1040 vw                      |                               | Ph (15)                                              |
|                              | 3071 s                        | $\nu$ CH                             | 1027 vw                      | 1031 m                        | Ph (18a)                                             |
|                              | 2980 w                        | ?                                    | 1005 vw                      | 1006 vs                       | Ph (12), $\rho$ $\text{NH}_3^+$                      |
|                              | 2927 w                        | ?                                    |                              | 993 sh                        | Ph (12), $\rho$ $\text{NH}_3^+$                      |
| 2733 mb                      |                               | $\nu$ (N-H...O)                      | 898 s                        | 890 w                         | $\nu_3$ $\text{SeO}_4^{2-}$                          |
| 2604 mb                      | 2625 w                        | $\nu$ (N-H...O)                      | 857 sb                       | 858 m                         | $\nu_3$ $\text{SeO}_4^{2-}$                          |
| 2098 wb                      |                               | $\nu$ (N-H...O)                      |                              | 843 m                         | $\nu_3$ $\text{SeO}_4^{2-}$                          |
| 1802 vw                      |                               | ?                                    | 832 sb                       |                               | ?                                                    |
| 1676 m                       |                               | $\delta$ $\text{NH}_3^+$             |                              | 822 s                         | $\nu_1$ $\text{SeO}_4^{2-}$                          |
| 1642 m                       |                               | $\delta$ $\text{NH}_3^+$             | 793 m                        | 794 s                         | Ph (11), $\rho$ $\text{NH}_3^+$ , $\gamma$ (N-H...O) |
| 1633 sh                      |                               | $\delta$ $\text{NH}_3^+$             | 749 s                        |                               | Ph (11), $\nu$ CN                                    |
| 1619 m                       |                               | $\delta$ $\text{NH}_3^+$             | 741 m                        |                               | Ph (11), $\nu$ CN                                    |
| 1607 s                       | 1605 m                        | Ph (8b), $\delta$ $\text{NH}_3^+$    | 736 s                        |                               | Ph (11), $\gamma$ (X-H...O)                          |
| 1588 s                       |                               | Ph (8a), $\delta$ $\text{NH}_3^+$    | 723 sh                       |                               | Ph (4)                                               |
| 1573 sh                      |                               | $\delta$ $\text{NH}_3^+$             | 689 m                        |                               | Ph (4)                                               |
| 1531 s                       |                               | $\delta$ $\text{NH}_3^+$             | 655 mb                       |                               | ?                                                    |
| 1498 s                       | 1500 vw                       | Ph (19a), $\delta_s$ $\text{NH}_3^+$ | 619 w                        | 619 w                         | Ph (6b)                                              |
| 1462 m                       |                               | Ph (19b)                             | 615 w                        |                               | Ph (6b), $\gamma$ (X-H...O)                          |
| 1367 sh                      |                               | Ph (3), $\delta$ CCN                 | 535 w                        |                               | Ph (6a)                                              |
| 1345 w                       |                               | Ph (14)                              | 522 sh                       | 523 w                         | Ph (6a)                                              |
| 1341 w                       |                               | Ph (14)                              | 494 m                        |                               | $\delta$ CCC                                         |
| 1327 w                       |                               | Ph (14), $\delta$ CCN                | 478 m                        |                               | Ph (16b), $\rho$ $\text{NH}_3^+$                     |
| 1290 w                       |                               | Ph (3), $\delta$ CCN                 | 476 sh                       |                               | Ph (16b), $\rho$ $\text{NH}_3^+$                     |
| 1244 wb                      |                               | ?                                    | 455 w                        |                               | Ph (16a)                                             |
| 1224 w                       |                               | Ph (9b), $\delta$ CCN                | 426 mb                       | 418 w                         | Ph (16a), $\nu_4$ $\text{SeO}_4^{2-}$                |
| 1213 w                       |                               | Ph (9a)                              |                              | 391 w                         | ?                                                    |
| 1199 w                       | 1205 m                        | Ph (9a)                              |                              | 359 m                         | $\nu_2$ $\text{SeO}_4^{2-}$                          |
| 1191 w                       |                               | Ph (9a)                              |                              | 323 w                         | External mode                                        |
| 1173 sh                      | 1176 m                        | Ph (9a)                              |                              | 134 sh                        | External mode                                        |
| 1163 w                       |                               | ?                                    |                              | 116 vs                        | External mode                                        |
| 1153 m                       |                               | Ph (9b), $\rho$ $\text{NH}_3^+$      |                              |                               |                                                      |

*Note:* Abbreviations and symbols: vs, very strong; s, strong; m, medium; w, weak; b, broad; sh, shoulder;  $\nu$ , stretching;  $\delta$ , deformation or in-plane bending;  $\gamma$ ,  $\pi$ , out-of-plane bending;  $\rho$ , rocking;  $\omega$ , wagging;  $\tau$ , torsion; s, symmetric; as, antisymmetric; atom X = O, N.

**Table S5:** FTIR and Raman spectra of **an<sub>2</sub>SeO<sub>4</sub>·2H<sub>2</sub>O**

| FTIR<br>(cm <sup>-1</sup> ) | Raman<br>(cm <sup>-1</sup> ) | Assignment                                                     | FTIR<br>(cm <sup>-1</sup> ) | Raman<br>(cm <sup>-1</sup> ) | Assignment                                               |
|-----------------------------|------------------------------|----------------------------------------------------------------|-----------------------------|------------------------------|----------------------------------------------------------|
|                             | 3208 vw                      | v (X-H...O)                                                    | 1152 w                      | 1158 m                       | Ph (9b), ρ NH <sub>3</sub> <sup>+</sup>                  |
|                             | 3067 s                       | v CH                                                           | 1125 m                      |                              | Ph (9b), v CN                                            |
| 3059 w                      | 3059 s                       | v CH                                                           |                             | 1104 w                       | Ph (5), ρ NH <sub>3</sub> <sup>+</sup>                   |
| 3049 w                      | 3050 sh                      | v CH                                                           | 1090 w                      | 1087 w                       | Ph (5), ρ NH <sub>3</sub> <sup>+</sup>                   |
|                             | 3014 vw                      | v CH                                                           | 1066 w                      |                              | Ph (17a)                                                 |
|                             | 2984 w                       | ?                                                              | 1027 w                      | 1026 m                       | Ph (18a)                                                 |
| 2854 mb                     |                              | v (X-H...O)                                                    | 1004 w                      | 1003 vs                      | Ph (12), ρ NH <sub>3</sub> <sup>+</sup>                  |
| 2729 m                      |                              | v (X-H...O)                                                    |                             | 969 w                        | Ph (10b), ρ NH <sub>3</sub> <sup>+</sup>                 |
|                             | 2613 w                       | v (X-H...O)                                                    | 899 s                       |                              | v <sub>3</sub> SeO <sub>4</sub> <sup>2-</sup>            |
| 2593 mb                     | 2581 w                       | v (X-H...O)                                                    |                             | 881 m                        | v <sub>3</sub> SeO <sub>4</sub> <sup>2-</sup> , Ph (10b) |
| 2361 w                      |                              | v (X-H...O)                                                    | 867 s                       |                              | v <sub>3</sub> SeO <sub>4</sub> <sup>2-</sup>            |
| 2097 mb                     |                              | v (X-H...O)                                                    | 840 sh                      |                              | ?                                                        |
| 1694 w                      |                              | v <sub>3</sub> + v <sub>1</sub> SeO <sub>4</sub> <sup>2-</sup> | 832 s                       | 834 vs                       | v <sub>1</sub> SeO <sub>4</sub> <sup>2-</sup>            |
| 1678 w                      |                              | δ NH <sub>3</sub> <sup>+</sup>                                 | 792 sh                      | 797 m                        | Ph (11), ρ NH <sub>3</sub> <sup>+</sup> , γ (X-H...O)    |
| 1648 w                      |                              | δ NH <sub>3</sub> <sup>+</sup> , δ H <sub>2</sub> O            | 748 s                       |                              | Ph (11), v CN                                            |
| 1631 sh                     | 1629 m                       | δ NH <sub>3</sub> <sup>+</sup>                                 | 740 s                       | 741 w                        | Ph (11), v CN                                            |
| 1617 sh                     |                              | δ NH <sub>3</sub> <sup>+</sup>                                 | 736 s                       |                              | Ph (11), γ (X-H...O)                                     |
| 1608 m                      | 1609 m                       | Ph (8b), δ NH <sub>3</sub> <sup>+</sup>                        | 722 sh                      |                              | Ph (4)                                                   |
| 1586 m                      |                              | Ph (8a), δ NH <sub>3</sub> <sup>+</sup>                        | 688 s                       | 689 w                        | Ph (4)                                                   |
| 1570 m                      |                              | δ NH <sub>3</sub> <sup>+</sup>                                 | 620 m                       | 617 m                        | Ph (6b)                                                  |
| 1529 m                      |                              | δ NH <sub>3</sub> <sup>+</sup>                                 | 615 sh                      |                              | Ph (6b), γ (X-H...O)                                     |
| 1498 s                      | 1500 w                       | Ph (19a), δ <sub>s</sub> NH <sub>3</sub> <sup>+</sup>          | 535 m                       | 534 w                        | Ph (6a)                                                  |
| 1462 w                      | 1462 w                       | Ph (19b)                                                       |                             | 525 w                        | Ph (6a)                                                  |
|                             | 1380 vw                      | Ph (3), δ CCN                                                  | 494 m                       |                              | ?                                                        |
| 1341 w                      | 1341 vw                      | ?                                                              | 479 m                       |                              | Ph (16b), ρ NH <sub>3</sub> <sup>+</sup>                 |
| 1327 w                      |                              | Ph (14), δ CCN                                                 | 455 mb                      | 457 m                        | ?                                                        |
| 1292 w                      |                              | Ph (3), δ CCN                                                  | 423 mb                      | 423 m                        | Ph (16a), v <sub>4</sub> SeO <sub>4</sub> <sup>2-</sup>  |
| 1225 w                      | 1224 m                       | Ph (9b), δ CCN                                                 | 417 sh                      |                              | Ph (16a), v <sub>4</sub> SeO <sub>4</sub> <sup>2-</sup>  |
| 1214 w                      | 1212 m                       | Ph (9a)                                                        |                             | 403 m                        | ?                                                        |
| 1198 w                      |                              | Ph (9a)                                                        |                             | 335 mb                       | v <sub>2</sub> SeO <sub>4</sub> <sup>2-</sup>            |
| 1189 w                      | 1180 m                       | Ph (9a)                                                        |                             | 273 w                        | External mode                                            |
|                             | 1173 m                       | Ph (9a)                                                        |                             | 165 m                        | External mode                                            |

**Table S6:** FTIR and Raman spectra of **an<sub>2</sub>SO<sub>4</sub>**

| FTIR (cm <sup>-1</sup> ) |         |         | FT Raman (cm <sup>-1</sup> ) |         |         | Assignment                              | FTIR (cm <sup>-1</sup> ) |         |        | FT Raman (cm <sup>-1</sup> ) |         |         | Assignment                                                                              |       |               |
|--------------------------|---------|---------|------------------------------|---------|---------|-----------------------------------------|--------------------------|---------|--------|------------------------------|---------|---------|-----------------------------------------------------------------------------------------|-------|---------------|
| 298 K                    | 200 K   | 100 K   | 298 K                        | 190 K   | 100 K   |                                         | 298 K                    | 200 K   | 100 K  | 298 K                        | 190 K   | 100 K   |                                                                                         |       |               |
| 3433 mb                  | 3388 mb | 3356 mb |                              |         |         | v (N-H...O)                             |                          |         |        | 1173 m                       | 1173 m  | 1174 m  | Ph (9a)                                                                                 |       |               |
|                          | 3239 mb | 3214 m  |                              |         |         | v (N-H...O)                             |                          |         |        | 1160 w                       | 1160 w  | 1161 w  | Ph (9b), ρ NH <sub>3</sub> <sup>+</sup>                                                 |       |               |
|                          | 3146 mb | 3123 m  |                              |         |         | v (N-H...O)                             |                          |         |        |                              | 1149 s  |         | Ph (9b), ρ NH <sub>3</sub> <sup>+</sup>                                                 |       |               |
|                          | 3068 w  | 3070 w  | 3071 m                       | 3071 m  | 3071 m  | v CH, v (N-H...O)                       | 1137 s                   | 1139 sb | 1136 s | 1124 w                       | 1122 w  | 1125 w  | v <sub>3</sub> SO <sub>4</sub> <sup>2-</sup> , Ph (9b), v CN                            |       |               |
| 3060 w                   | 3060 w  | 3061 w  | 3061 m                       | 3061 m  | 3058 m  | v CH, v (N-H...O)                       |                          |         |        | 1105 sh                      | 1106 vw |         | Ph (5), ρ NH <sub>3</sub> <sup>+</sup>                                                  |       |               |
| 3050 m                   | 3048 w  | 3046 w  | 3051 w                       | 3050 w  | 3048 w  | v CH, v (N-H...O)                       |                          |         |        | 1095 s                       |         |         | v <sub>3</sub> SO <sub>4</sub> <sup>2-</sup> , Ph (5), ρ NH <sub>3</sub> <sup>+</sup>   |       |               |
|                          |         |         | 3025 w                       | 3028 w  | 3028 w  | v CH, v (N-H...O)                       | 1089 s                   | 1088 sb | 1081 s |                              | 1089 w  | 1089 w  | v <sub>3</sub> SO <sub>4</sub> <sup>2-</sup> , Ph (19b)                                 |       |               |
|                          |         |         | 3017 w                       | 3016 w  | 3015 w  | v CH, v (N-H...O)                       | 1069 s                   | 1070 s  | 1071 s |                              |         | 1066 w  | Ph (15)                                                                                 |       |               |
|                          |         |         | 2985 w                       | 2986 w  | 2987 w  | v (N-H...O)                             | 1056 s                   |         | 1057 s |                              |         |         | Ph (17a), v <sub>3</sub> SO <sub>4</sub> <sup>2-</sup>                                  |       |               |
| 2894 sb                  |         |         |                              |         |         | v (N-H...O), v (O-H...O)                | 1026 s                   | 1025 s  | 1022 s | 1027 m                       | 1027 m  | 1027 m  | Ph (18a), γ (O-H...O)                                                                   |       |               |
| 2593 sb                  | 2597 sb | 2598 sb |                              |         |         | v (O-H...O)                             | 1003 w                   | 1003 w  | 1003 w | 1004 vs                      | 1004 vs | 1004 vs | Ph (12), ρ NH <sub>3</sub> <sup>+</sup>                                                 |       |               |
|                          |         | 2394 m  |                              |         |         | v (O-H...O)                             |                          | 981 w   | 982 w  |                              | 979 s   | 982 s   | v <sub>1</sub> SO <sub>4</sub> <sup>2-</sup> , Ph (10b), ρ NH <sub>3</sub> <sup>+</sup> |       |               |
|                          | 2125 w  | 2125 w  |                              |         |         | v (O-H...O)                             |                          | 976 w   | 977 w  | 976 s                        |         |         | v <sub>1</sub> SO <sub>4</sub> <sup>2-</sup> , Ph (10b), ρ NH <sub>3</sub> <sup>+</sup> |       |               |
| 2092 mb                  | 2080 mb | 2083 mb |                              |         |         | ?                                       | 973 sh                   | 972 w   | 973 w  |                              |         |         | Ph (5)                                                                                  |       |               |
| 1947 w                   | 1945 w  | 1947 w  |                              |         |         | ?                                       |                          |         | 968 w  |                              |         |         | Ph (17a)                                                                                |       |               |
| 1873 w                   | 1874 w  | 1874 w  |                              |         |         | ?                                       |                          | 906 m   | 907 m  |                              |         |         | ?                                                                                       |       |               |
| 1746 w                   | 1747 w  | 1747 w  |                              |         |         | ?                                       | 905 m                    |         | 904 sh |                              |         |         | Ph (10b)                                                                                |       |               |
|                          | 1688 w  | 1698 w  |                              |         |         | δ NH <sub>3</sub> <sup>+</sup>          | 843 w                    | 842 w   | 844 w  |                              |         |         | Ph (1), γ (O-H...O)                                                                     |       |               |
|                          | 1643 sh | 1645 sh |                              |         |         | δ NH <sub>3</sub> <sup>+</sup>          |                          |         |        |                              | 820 w   | 821 w   | Ph (10a)                                                                                |       |               |
|                          | 1627 m  | 1630 m  | 1629 w                       | 1627 w  | 1628 w  | δ NH <sub>3</sub> <sup>+</sup>          |                          |         |        | 816 w                        | 814 w   | 814 w   | Ph (10a)                                                                                |       |               |
|                          | 1617 m  | 1620 m  |                              |         |         | δ NH <sub>3</sub> <sup>+</sup>          | 803 w                    |         | 801 vw | 800 m                        | 800 m   | 800 m   | Ph (11), ρ NH <sub>3</sub> <sup>+</sup>                                                 |       |               |
|                          |         | 1615 sh |                              |         |         | δ NH <sub>3</sub> <sup>+</sup>          |                          | 746 s   | 747 s  |                              |         |         | Ph (11), v CN                                                                           |       |               |
| 1608 s                   | 1609 m  | 1609 m  | 1608 m                       | 1609 m  | 1610 m  | Ph (8b)                                 | 743 s                    | 740 s   | 740 s  |                              | 741 vw  |         | Ph (11), v CN                                                                           |       |               |
|                          | 1600 m  | 1602 m  |                              |         |         | Ph (8b), δ NH <sub>3</sub> <sup>+</sup> |                          | 736 s   | 736 s  |                              |         |         | Ph (11)                                                                                 |       |               |
| 1589 s                   | 1589 m  | 1591 m  |                              | 1600 sh | 1598 w  | Ph (8a), δ NH <sub>3</sub> <sup>+</sup> |                          |         | 721 w  |                              |         |         | Ph (4)                                                                                  |       |               |
| 1574 s                   | 1575 sh | 1566 s  |                              |         |         | δ NH <sub>3</sub> <sup>+</sup>          | 690 s                    |         | 690 s  |                              |         |         | Ph (4)                                                                                  |       |               |
| 1555 s                   | 1558 s  | 1559 sh |                              |         |         | δ NH <sub>3</sub> <sup>+</sup>          |                          | 688 s   | 688 s  |                              |         |         | Ph (4)                                                                                  |       |               |
|                          | 1533 m  | 1530 m  |                              |         |         | ?                                       | 641 m                    | 644 m   | 646 m  | 644 w                        | 644 vw  |         | Ph (6b)                                                                                 |       |               |
|                          | 1515 sh | 1515 sh |                              |         |         | ?                                       |                          |         | 618 sh | 618 w                        | 616 w   | 619 w   | v <sub>4</sub> SO <sub>4</sub> <sup>2-</sup> , Ph (6b)                                  |       |               |
| 1500 s                   | 1499 s  | 1498 s  | 1500 vw                      | 1500 vw |         | Ph (19a)                                | 615 m                    | 615 m   | 614 m  |                              |         |         | v <sub>4</sub> SO <sub>4</sub> <sup>2-</sup>                                            |       |               |
| 1462 m                   | 1462 m  | 1462 m  | 1462 vw                      | 1462 vw | 1460 vw | Ph (19b)                                | 607 m                    | 605 m   | 604 m  | 607 sh                       | 609 vw  | 610 vw  | v <sub>4</sub> SO <sub>4</sub> <sup>2-</sup>                                            |       |               |
| 1405 vw                  |         |         |                              |         |         | ?                                       | 533 m                    | 534 m   | 535 w  | 533 w                        | 534 w   | 534 w   | Ph (6a)                                                                                 |       |               |
| 1390 vw                  |         |         |                              |         |         | Ph (3), δ CCN                           | 528 w                    | 527 w   | 526 w  | 515 vw                       | 525 vw  | 524 vw  | Ph (6a)                                                                                 |       |               |
| 1341 m                   | 1340 m  | 1339 w  |                              |         |         | ?                                       | 490 s                    | 491 s   | 491 s  |                              | 493 vw  |         | v <sub>2</sub> SO <sub>4</sub> <sup>2-</sup>                                            |       |               |
| 1329 w                   | 1329 w  | 1329 w  |                              |         |         | Ph (14), δ CCN                          | 478 s                    | 479 s   | 479 s  | 453 w                        | 454 w   | 456 w   | v <sub>2</sub> SO <sub>4</sub> <sup>2-</sup> , Ph (16b), ρ NH <sub>3</sub> <sup>+</sup> |       |               |
|                          | 1321 w  | 1322 w  |                              |         |         | Ph (14), δ CCN                          |                          |         | 466 w  |                              |         |         | Ph (16b), ρ NH <sub>3</sub> <sup>+</sup>                                                |       |               |
| 1294 m                   | 1293 m  | 1294 m  |                              |         |         | Ph (3), δ CCN                           |                          | 454 w   | 453 w  |                              |         |         | ?                                                                                       |       |               |
|                          |         | 1229 w  | 1225 m                       | 1227 m  | 1229 m  | Ph (9b), δ CCN                          | 445 m                    | 445 m   | 446 m  | 443 w                        | 445 w   | 445 w   | ?                                                                                       |       |               |
| 1216 w                   | 1217 w  | 1217 w  | 1215 m                       | 1217 m  | 1217 m  | ?                                       | 419 m                    | 420 m   | 420 m  |                              |         |         | Ph (16a)                                                                                |       |               |
|                          |         | 1209 w  | 1206 vw                      |         | 1204 vw | Ph (9a)                                 |                          |         | 402 m  |                              |         |         | External mode                                                                           |       |               |
| 1191 w                   | 1197 w  | 1197 vw |                              | 1189 sh |         | ?                                       |                          |         |        |                              |         | 186 sh  | External mode                                                                           |       |               |
|                          |         |         | 1181 m                       | 1180 m  | 1180 m  | Ph (9a)                                 |                          |         |        |                              |         | 174 m   | 177 m                                                                                   | 181 m | External mode |

**Figure S1** (Supporting Information): Atom numbering of isomorphous crystals of  $\text{an}_2\text{SO}_4$  and  $\text{an}_2\text{SeO}_4$ . Dashed lines indicate hydrogen bonds.

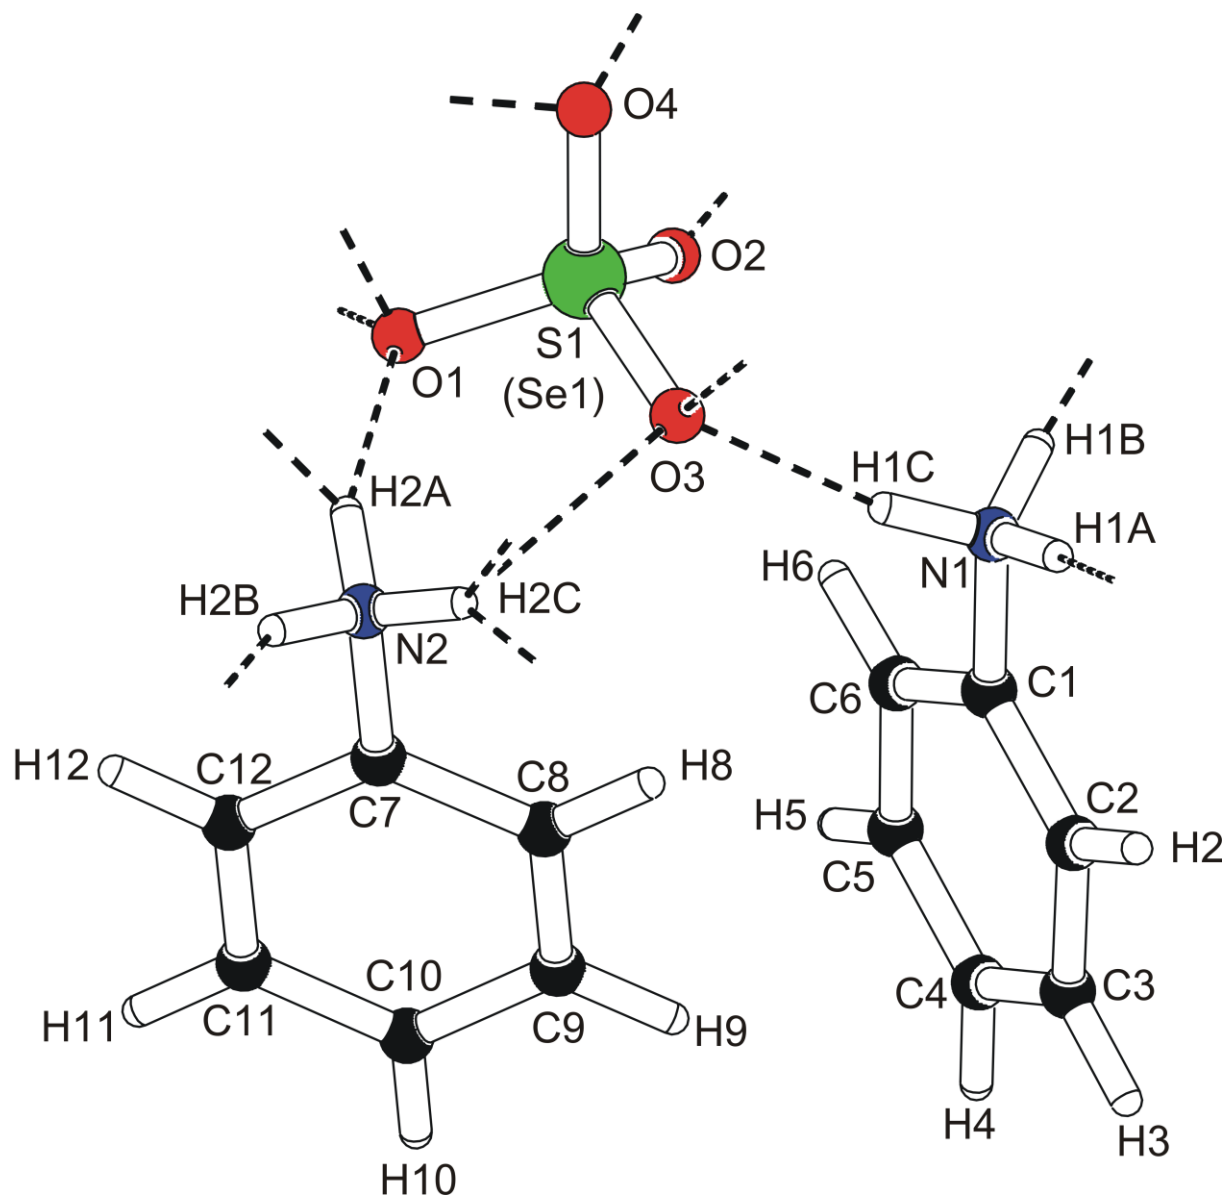



**Figure S2** (Supporting Information): Atom numbering of  $\text{an}_2\text{SeO}_4 \cdot 2\text{H}_2\text{O}$ . The dashed lines indicate the hydrogen bonds.

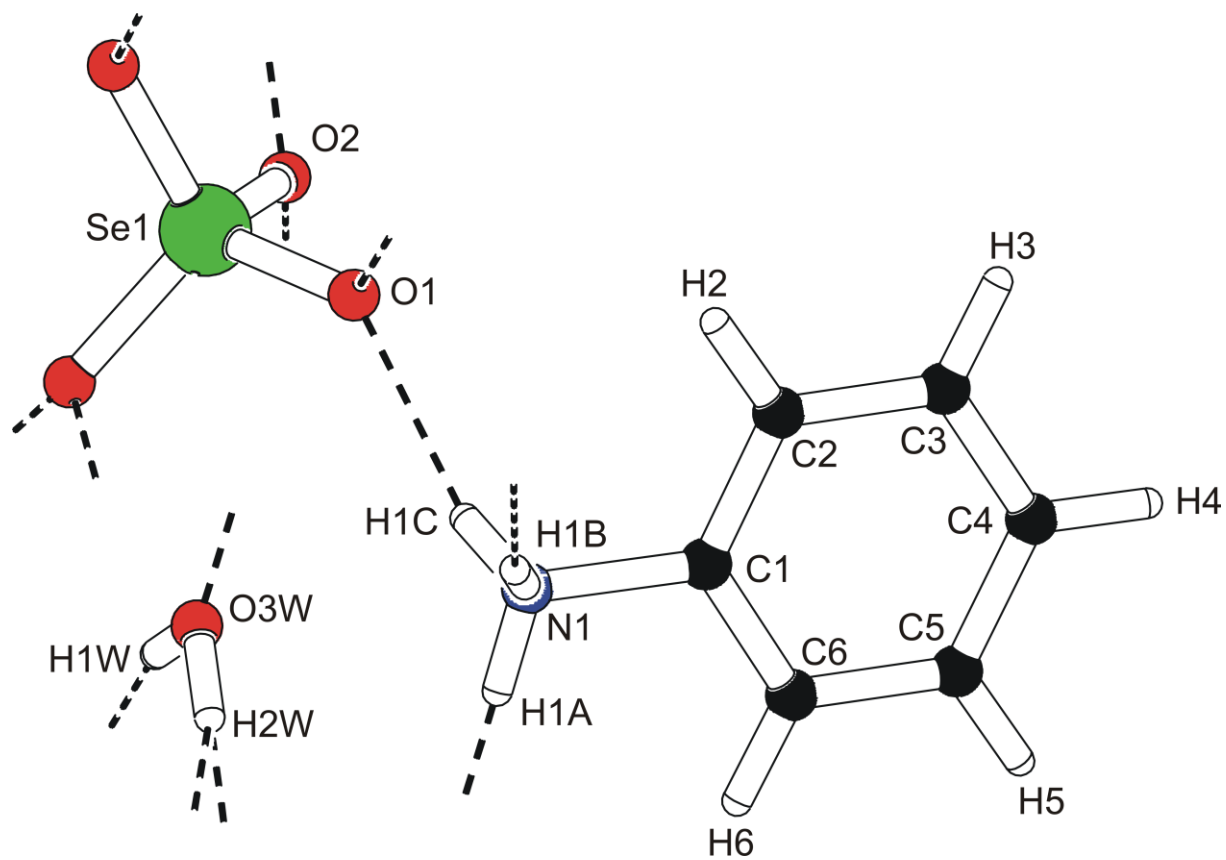

**Figure S3** (Supporting Information): FTIR (nujol mull) and FT Raman spectra of **an<sub>2</sub>SeO<sub>4</sub>**.  
Nujol bands are indicated by asterisks.

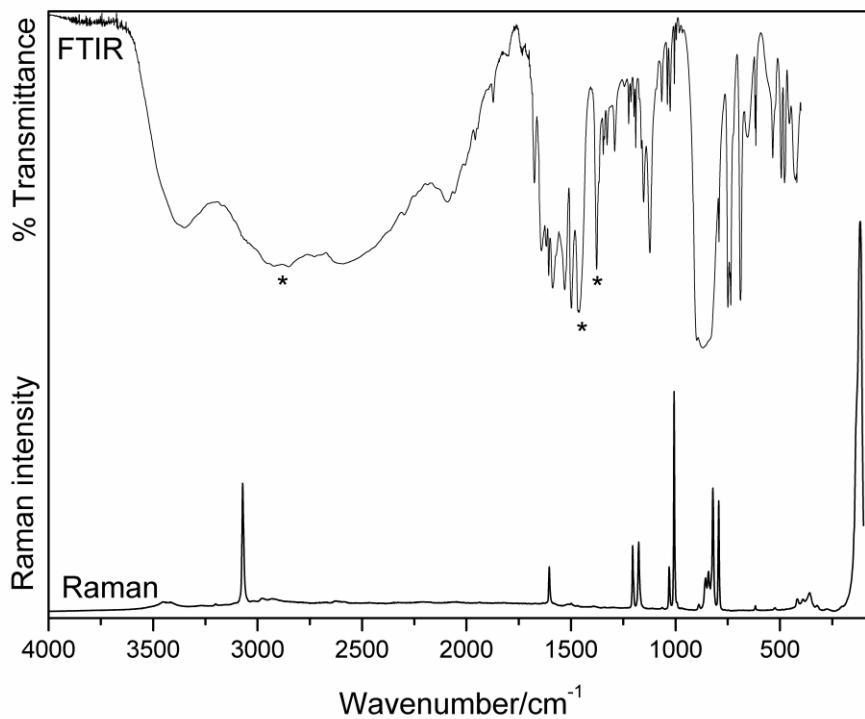

**Figure S4** (Supporting Information): FTIR (nujol mull) and FT Raman spectra of  $\text{an}_2\text{SeO}_4 \cdot 2\text{H}_2\text{O}$ . Nujol bands are indicated by asterisks.

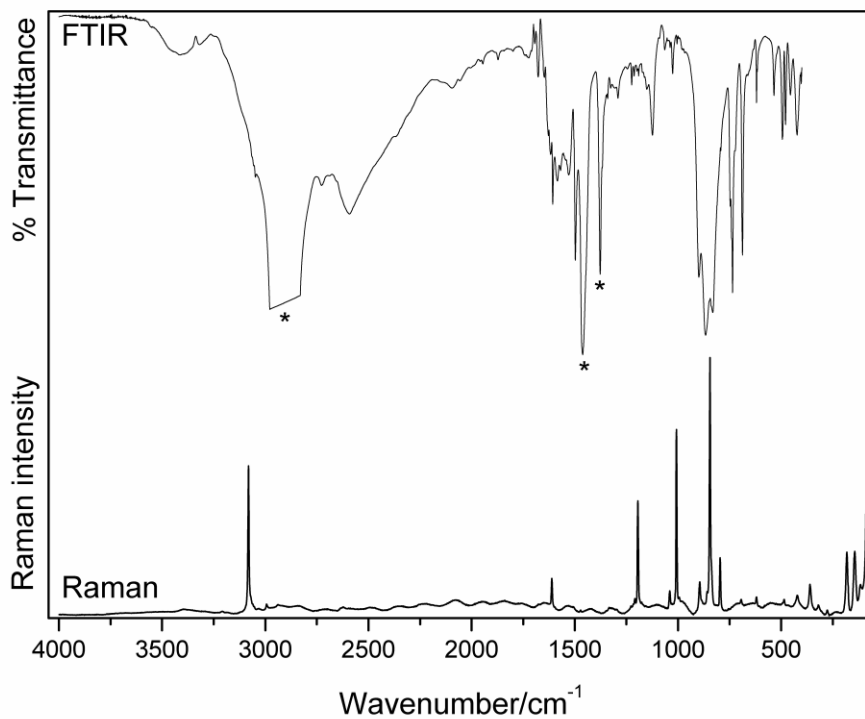

**Figure S5** (Supporting Information): Correlation diagram of  $\text{XO}_4^{2-}$  internal modes ( $X = \text{Se}, \text{S}$ ) in  $\text{an}_2\text{SeO}_4$  and  $\text{an}_2\text{SO}_4$  crystals.

| Free ion modes | Degrees of freedom | Free ion $\text{XO}_4^{2-}$ $T_d$ | „Site“ symmetry $C_1$ | Factor group $C_2$ | Vibrational modes                |
|----------------|--------------------|-----------------------------------|-----------------------|--------------------|----------------------------------|
| $\nu_1$        | 4                  | $A_1$                             |                       | A (IR, Ra)         | $2\nu_1, 4\nu_2, 6\nu_3, 6\nu_4$ |
| $\nu_2$        | 4                  | E                                 |                       | B (IR, Ra)         | $2\nu_1, 4\nu_2, 6\nu_3, 6\nu_4$ |
| $\nu_3$        | 4                  | $F_2$                             |                       |                    |                                  |
| $\nu_4$        | 4                  | $F_2$                             |                       |                    |                                  |

**Figure S6** (Supporting Information): Correlation diagram of the  $\text{SeO}_4^{2-}$  internal modes in  $\text{an}_2\text{SeO}_4\cdot 2\text{H}_2\text{O}$  crystals.

| Free ion modes | Degrees of freedom | Free ion $\text{SeO}_4^{2-}$ $T_d$ | Site symmetry |        | Factor group $C_{2h}$ | Vibrational modes |                                 |
|----------------|--------------------|------------------------------------|---------------|--------|-----------------------|-------------------|---------------------------------|
|                |                    |                                    | $C_2$         |        |                       |                   |                                 |
| $\nu_1$        | 4                  | $A_1$                              | —             | A      | —                     | $A_g$ (Ra)        | $\nu_1, 2\nu_2, 3\nu_3, 3\nu_4$ |
| $\nu_2$        | 4                  | E                                  | —             | A      | —                     | $A_u$ (IR)        | $\nu_1, 2\nu_2, 3\nu_3, 3\nu_4$ |
| $\nu_3$        | 4                  | $F_2$                              | $\diagdown$   | A<br>B | $\diagup$             | $B_g$ (Ra)        | $\nu_1, 2\nu_2, 3\nu_3, 3\nu_4$ |
| $\nu_4$        | 4                  | $F_2$                              | $\diagdown$   | A<br>B | $\diagup$             | $B_u$ (IR)        | $\nu_1, 2\nu_2, 3\nu_3, 3\nu_4$ |

**Figure S7** (Supporting Information): FTIR (nujol mull) spectra of **an<sub>2</sub>SO<sub>4</sub>** at the temperature 298 and 100 K. Nujol bands are indicated by asterisks.

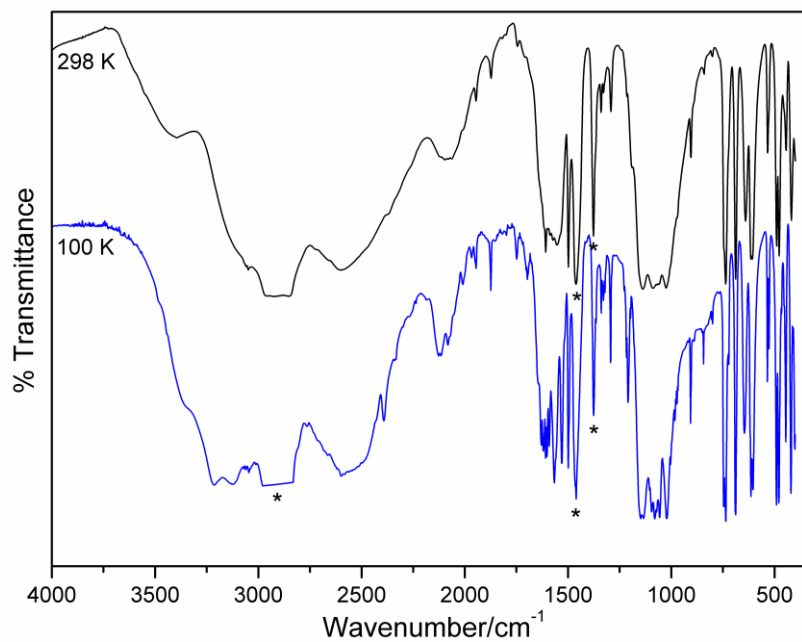

**Figure S8** (Supporting Information): FT Raman spectra of **an<sub>2</sub>SO<sub>4</sub>** at the temperature 298 and 100 K.

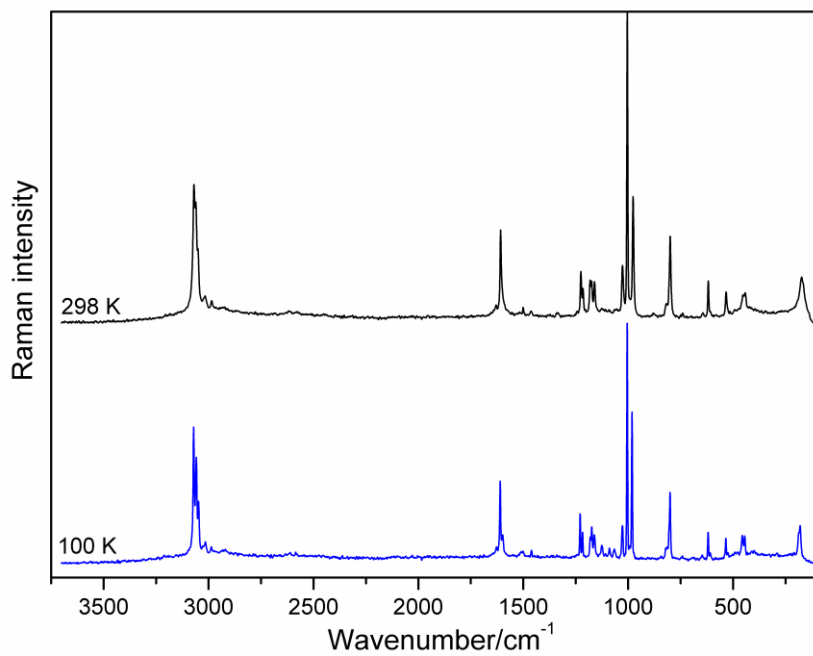

**Figure S9** (Supporting Information): FT Raman spectra of **an<sub>2</sub>SO<sub>4</sub>** at different temperatures (region of deformation modes of amino group).

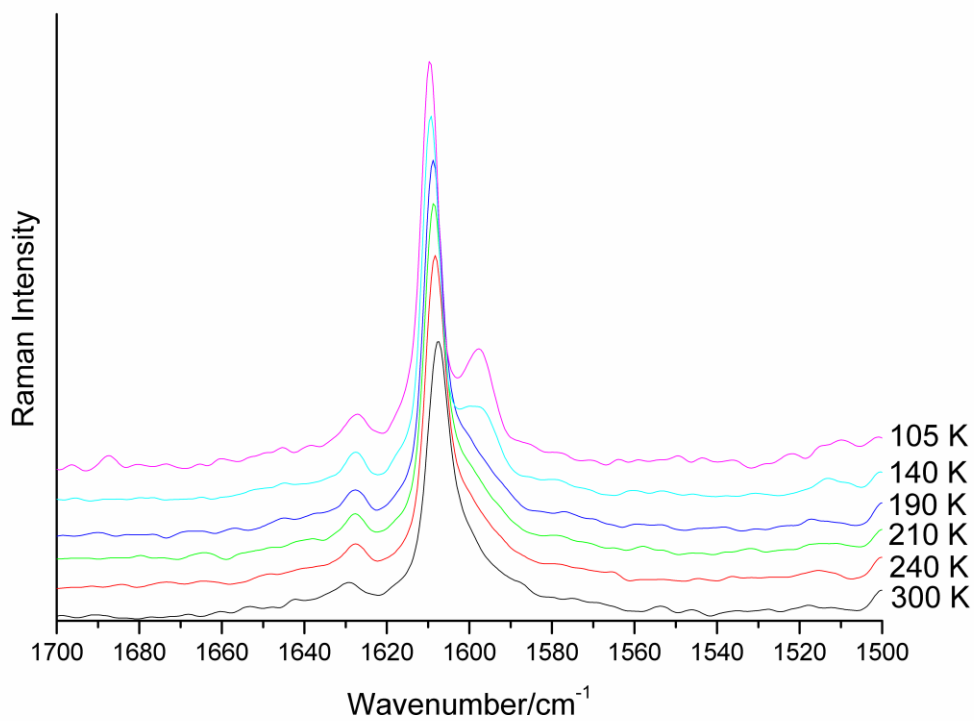

Supplement: c1ce05170a.pdf [file c1ce05170a.pdf]
